# Supplementary material
Source: PubMed Central journal article supplement (PMC4938755)

# **Sustained remission of diabetic hyperglycemia induced by central injection of fibroblast growth factor 1**

Jarrad M. Scarlett<sup>1,2,10</sup>, Jennifer M. Rojas<sup>1,10</sup>, Miles E. Matsen<sup>1</sup>, Karl J. Kaiyala<sup>3</sup>, Darko Stefanovski<sup>4</sup>, Richard N. Bergman<sup>5</sup>, Hong T. Nguyen<sup>1</sup>, Mauricio D. Dorfman<sup>1</sup>, Louise Lantier<sup>6</sup>, David H. Wasserman<sup>6</sup>, Zaman Mirzadeh<sup>7</sup>, Terry G. Unterman<sup>8,9</sup>, Gregory J. Morton<sup>1</sup>, and Michael W. Schwartz<sup>1</sup>.

## **SUPPLEMENTARY FIGURE LEGENDS**

**SUPPLEMENTARY FIGURE 1** Effect of i.c.v. FGF1 on glucoregulatory hormones in diabetic mice.

(a) Plasma levels of insulin (left) and glucagon levels (right) in *ob/ob* (B6) mice 18 weeks after a single i.c.v. injection of either mFGF1 (3 µg; black bars,  $n = 9$ ) or Veh (open bars,  $n = 8$ ). Data are mean  $\pm$  s.e.m.  $P = \text{ns}$ , i.c.v. mFGF1 vs. Veh as determined by two-tailed t-test. (b) Time course of changes of blood glucose levels (left), food intake (middle) and body weight (right) of *ob/ob* (B6) mice following a single injection of mFGF1 (3 µg; black symbols;  $n = 10$ ) or Veh (open symbols;  $n = 8$ ) into the 3<sup>rd</sup> ventricle. Data are the mean  $\pm$  s.e.m.  $**P < 0.01$  for group (Veh vs. FGF1) by repeated measures designs by linear mixed model analyses.  $*P < 0.05$ , icv mFGF1 vs. Veh by mixed factorial analyses.

**SUPPLEMENTARY FIGURE 2** Effect of i.c.v. FGF1 on plasma corticosterone levels in diabetic mice.

Plasma levels of corticosterone obtained 6 h after injection of mFGF1 (3 µg; black bars) or Veh (open bars) into either (a) the 3<sup>rd</sup> ventricle (3V; Veh,  $n = 8$ ; FGF1,  $n = 10$ ) or (b) the lateral ventricle (LV; Veh,  $n = 12$ ; FGF1,  $n = 12$ ) of *ob/ob* (B6) mice. (c) Plasma levels of corticosterone levels in *ob/ob* (B6) mice 18 wk after a single i.c.v. injection of either mFGF1 (3 µg; black bars,  $n = 9$ ) or Veh (open bars,  $n = 8$ ). In all instances, plasma was obtained during mid-light cycle following a 6 h fast. Data are mean  $\pm$  s.e.m.  $P = \text{ns}$ , i.c.v. mFGF1 vs. Veh as determined by two-tailed t-test.

**SUPPLEMENTARY FIGURE 3** Effect of i.c.v. FGF1 on food intake and body weight across multiple rodent models of T2D. **(a)** Time course of changes of food intake (left) and body weight (right) in *db/db* mice following i.c.v. injection of either mFGF1 (3 µg; *n* = 6) or Veh (*n* = 9). **(b)** Time course of changes of food intake (left) and body weight (right) in DIO WT mice in which hyperglycemia was induced with low-dose STZ (DIO-LD STZ) following i.c.v. injection of either mFGF1 (3 µg; *n* = 8) or Veh (*n* = 8). **(c)** Time course of changes of food intake (left) and body weight (right) of *ob/ob* (B6) mice following a single i.c.v. injection of hFGF1 (3 µg; grey symbols; *n*=6), mFGF1 (3 µg; black symbols; *n* = 6) or Veh (open symbols; *n* = 4). Data are mean ± s.e.m. \**P*<0.05, i.c.v. mFGF1 vs. Veh; #*P*<0.05, i.c.v. hFGF1 vs. Veh by mixed factorial analyses. **(d)** Time course of changes of food intake (left), body weight (middle), and fat mass (right) from *ad libitum*-fed ZDF rats following a single i.c.v. injection of either rFGF1 (3 µg; *n* = 10; black symbols) or Veh (*n* = 10; open symbols). Data are the mean ± s.e.m. Significant main effects in (left) (*P*<0.0001) and (middle) (*P* = 0.028) reflected group differences at earlier time points (treatment by day interaction is significant (*P*<0.0001). *P*-values for group (Veh vs. FGF1) by repeated measures designs by linear mixed model analyses.

**SUPPLEMENTARY FIGURE 4** Effect of i.c.v. FGF1 on hepatic *Ucp1* gene expression and plasma lipid levels. **(a)** brown adipose tissue (BAT) *Ucp1* gene expression in *ob/ob* (B6) mice that underwent a basal glucose turnover study followed by a FSIGT 7 d after a single i.c.v. injection of mFGF1 (3 µg, black symbols; *n* = 13) or Veh (open symbols; *n* = 9). **(b)** Plasma levels of triglycerides (left), cholesterol (middle) and non-esterified free fatty acids (NEFA; right) in *ob/ob* (B6) mice in samples obtained 28 d following a single i.c.v. injection of hFGF1 (3 µg; grey symbols; *n* = 6), mFGF1 (3µg; black symbols; *n* = 6) or Veh (open symbols; *n* = 4). **(c)** Plasma levels of triglycerides (left), cholesterol (middle), and NEFA (right) from *db/db* mice on samples obtained 28 d following a single i.c.v. injection of either mFGF1 (3 µg; *n* = 6) or Veh (*n* = 9). Data are mean ± s.e.m. #*P*<0.05, i.c.v. hFGF1 vs. Veh as determined by one-way ANOVA.

**SUPPLEMENTARY FIGURE 5** Effect of severe hyperglycemia on central FGF1-mediated glucose lowering. **(a)** Time course of blood glucose levels in more severely hyperglycemic, *ad libitum*-fed *ob/ob* (BTBR) mice following i.c.v. injection of mFGF1 (black symbols;  $n = 8$ ) or Veh (open symbols;  $n = 8$ ). **(b)** Time course of blood glucose levels in more severely hyperglycemic, *ad libitum*-fed *db/db* mice following i.c.v. injection of mFGF1 (black symbols;  $n = 4$ ) or Veh (open symbols;  $n = 9$ ). **(c)** Time course of blood glucose levels in more severely hyperglycemic, *ad libitum*-fed DIO WT mice treated with high dose-STZ (DIO-HD STZ) following i.c.v. injection of mFGF1 (black symbols;  $n = 4$ ) or Veh (open symbols;  $n = 3$ ). **(d)** Food intake (left), body weight (middle) and blood glucose (right) levels from *ad libitum*-fed DIO WT mice receiving continuous s.c. infusion of the insulin receptor antagonist S961 that received i.c.v. injection of either Veh (open symbols;  $n = 10$ ) or mFGF1 (3  $\mu$ g; black symbols;  $n = 11$ ). Data are mean  $\pm$  s.e.m. For Fig. 4d (left), the groups differed on days 1 and 2 ( $P < 0.0001$  and  $P = 0.043$ , respectively). \*P-values for group (Veh vs. FGF1) by repeated measures designs by linear mixed model analyses.

**SUPPLEMENTARY FIGURE 6** Effect of i.c.v. FGF1 in LIRFKO and IRF fl/fl control mice made hyperglycemic by systemic administration of the insulin receptor antagonist S961. Food intake (left) body weight (middle) and blood glucose levels (right) from *ad libitum*-fed IRF fl/fl littermate controls **(a)** and LIRFKO mice **(b)** in which hyperglycemia was induced by continuous s.c. infusion of the insulin receptor antagonist S961, following i.c.v. injection of either Veh (open symbols; IRF fl/fl,  $n = 12$ ; LIRFKO,  $n = 10$ ) or mFGF1 (3  $\mu$ g; black symbols; IRF fl/fl,  $n = 13$ ; LIRFKO,  $n = 11$ ). Data are mean  $\pm$  s.e.m. \* $P < 0.05$ , i.c.v. mFGF1 vs. Veh by mixed factorial analyses.

**SUPPLEMENTARY FIGURE 7** **(a)** Representative immunofluorescence images of c-Fos (red) in the hypothalamus of mice euthanized 90 min after a single i.c.v. injection of either Veh saline (left, of  $n = 20$  images), mFGF1 (3  $\mu$ g; middle, of  $n = 18$  images) or **(c)** hFGF19 (3  $\mu$ g; right, of  $n = 16$  images) (original

magnification, x20; Scale bar: 20  $\mu$ M). **(b)** C-Fos immunoreactive nuclei quantified from cells (both ependymal and tanycytes) lining the 3<sup>rd</sup> ventricle (3V) from anatomically matched sections from the hypothalamus of mice treated with either i.c.v. Veh (open bars;  $n = 4$ ), mFGF1 (grey bars;  $n = 4$ ) or hFGF19 (black bars;  $n = 4$ ). **(c)** Hypothalamic levels of mRNA encoding HSP25 obtained from chow-fed WT mice 24h after a single i.c.v. injection of either Veh ( $n = 9$ ) or mFGF1 (3  $\mu$ g;  $n = 8$ ). **(d)** Western blot image (left) and densitometric quantification of synaptophysin protein levels (right) in hypothalamus (normalized to the loading control,  $\beta$ -tubulin III) of *ob/ob* mice obtained 1 week following a single i.c.v. injection of mFGF1 (3  $\mu$ g;  $n = 6$ ) or Veh ( $n = 5$ ). Data are mean  $\pm$  s.e.m. \* $P < 0.05$ , i.c.v. mFGF1 (or hFGF19) vs. Veh as determined by one-way ANOVA or by two-tailed t-test.

# Supplementary Figure 1

**a**

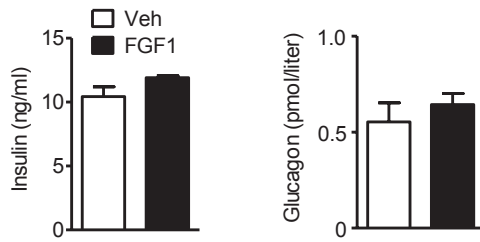

**b**

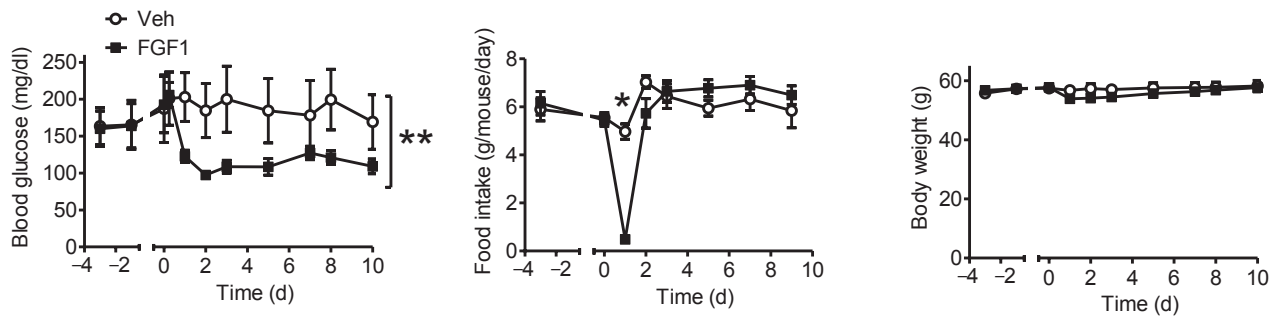

# Supplementary Figure 2

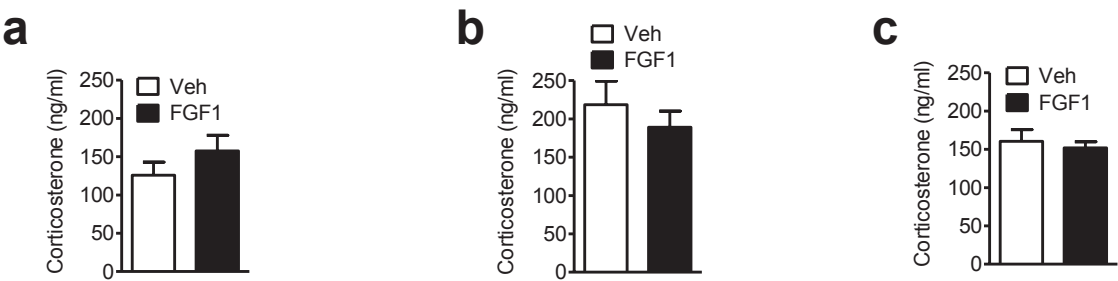

# Supplementary Figure 3

**a**

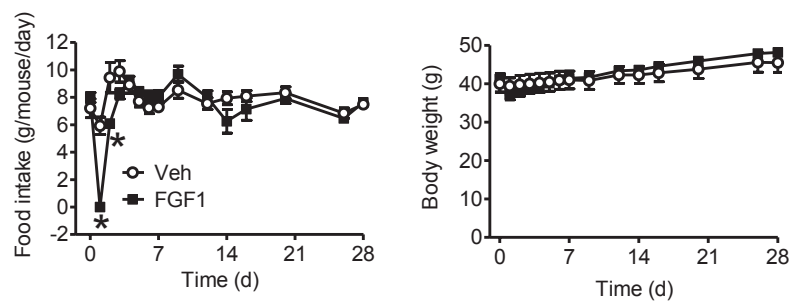

**b**

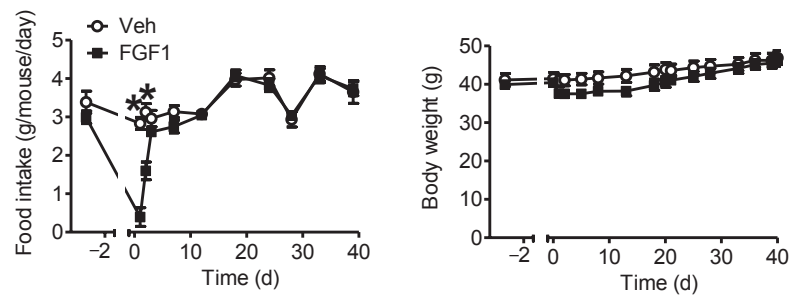

**c**

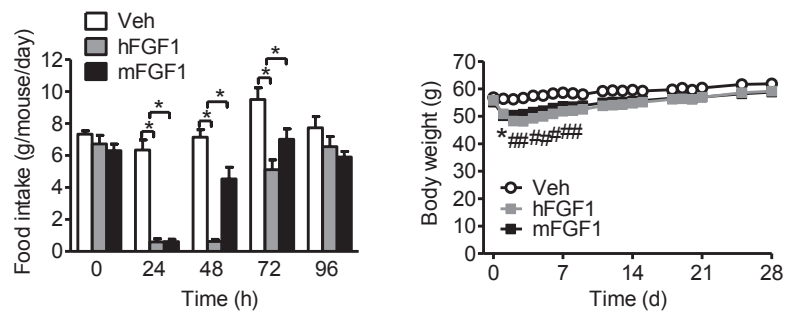

**d**

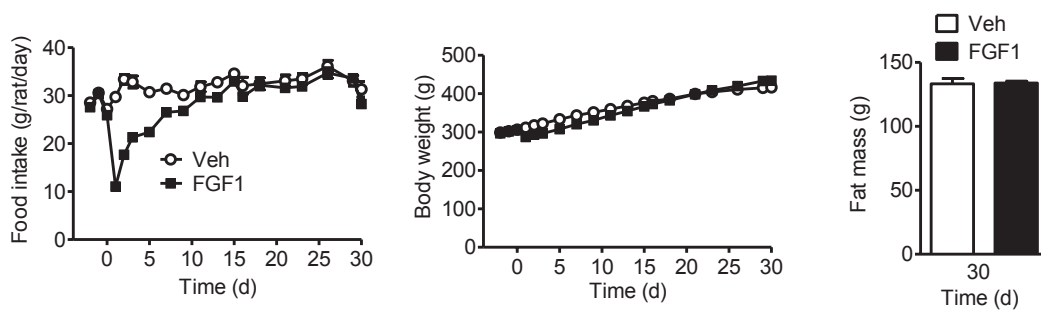

# Supplementary Figure 4

**a**

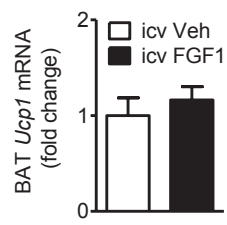

**b**

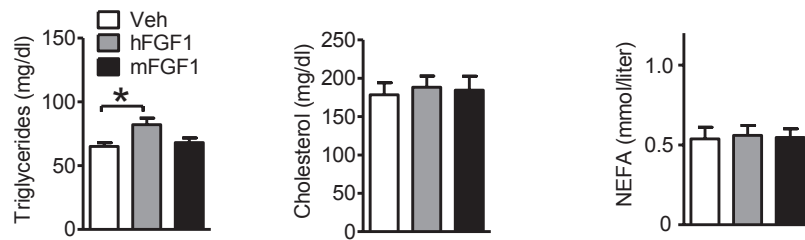

**c**

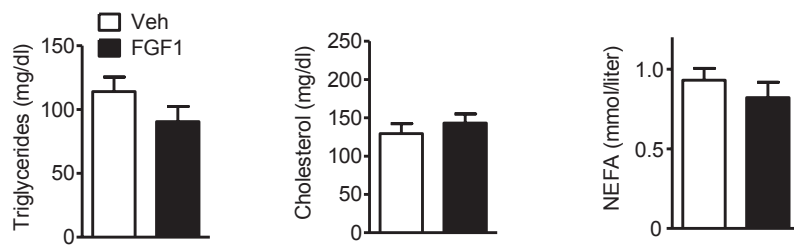

# Supplementary Figure 5

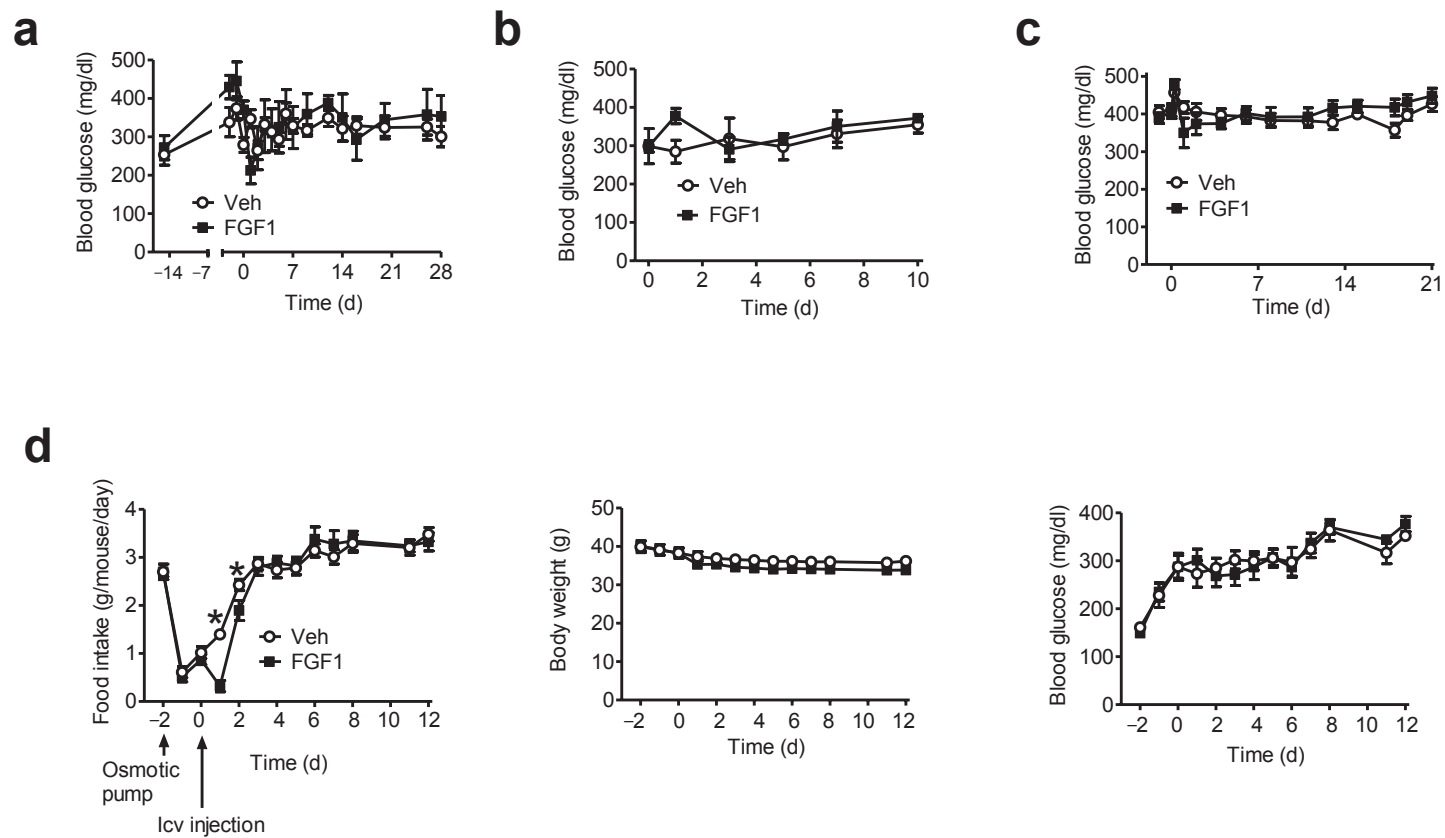

# Supplementary Figure 6

**a**

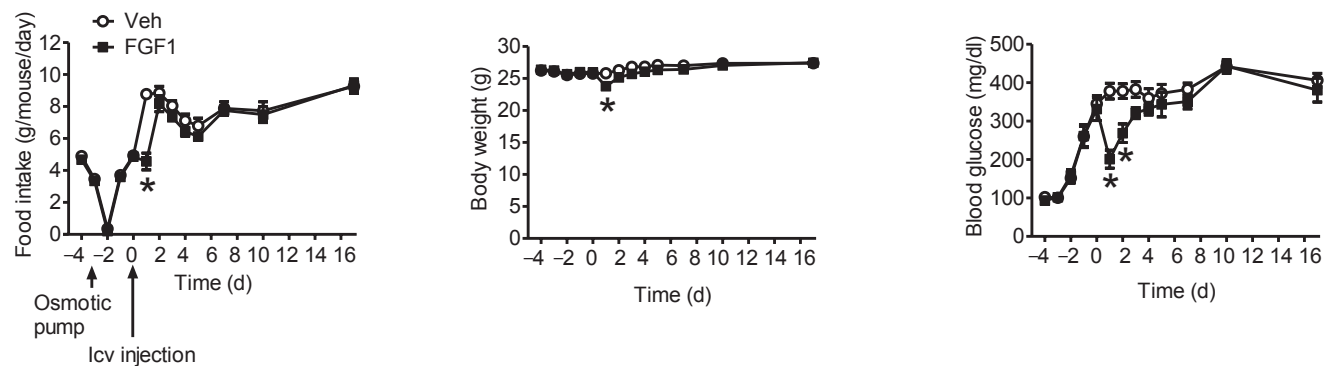

**b**

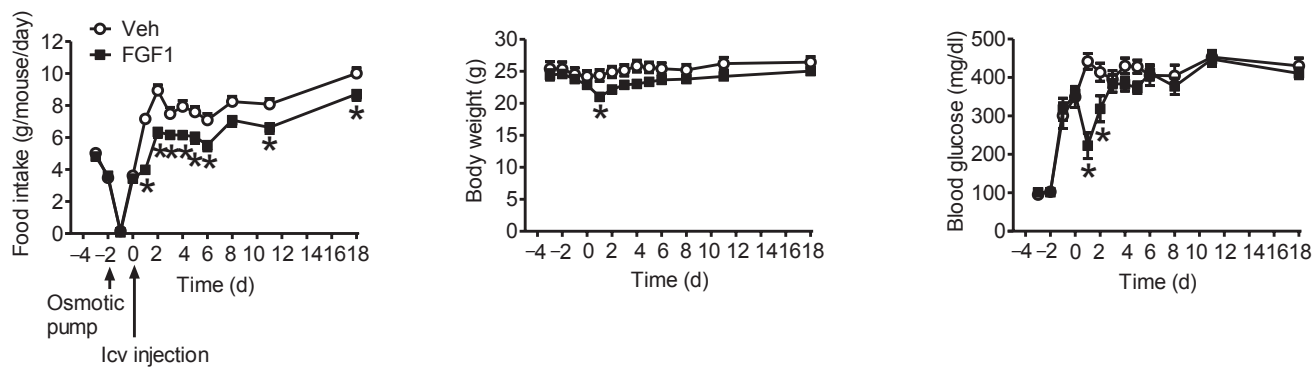

# Supplementary Figure 7

**a**

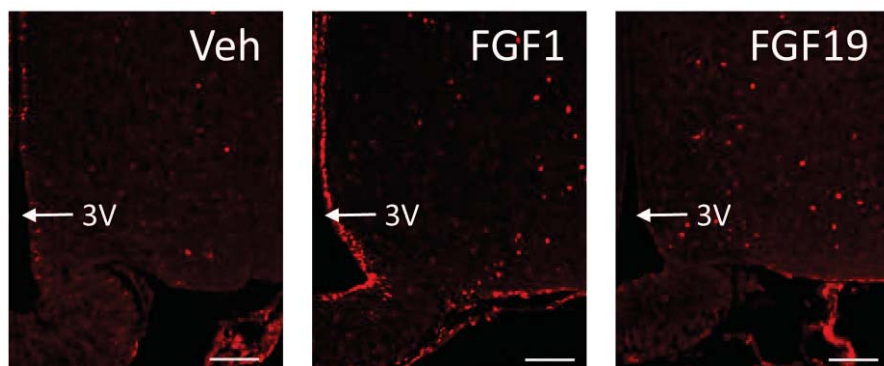

**b**

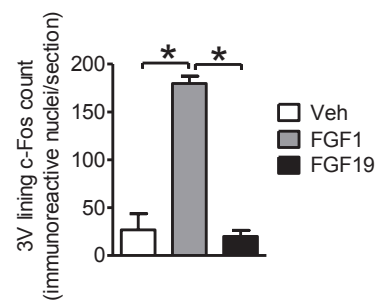

**c**

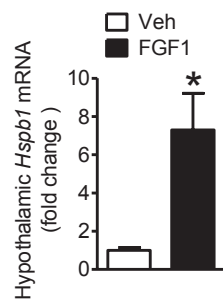

**d**

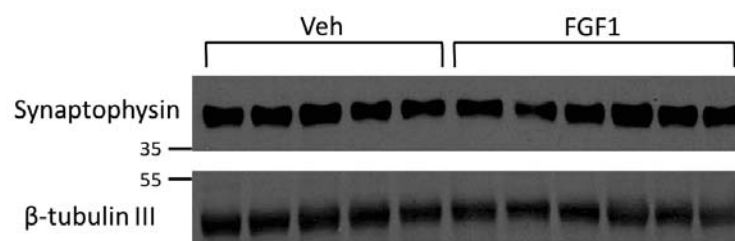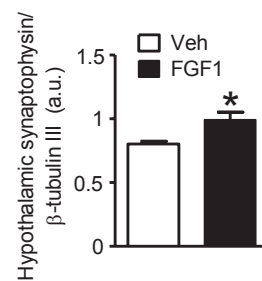

Supplement: NIHMS776830-supplement-1.pdf [file NIHMS776830-supplement-1.pdf]
